# Supplementary material for: Low‐Density Lipoprotein Cholesterol Corrected for Lipoprotein(a) Cholesterol, Risk Thresholds, and Cardiovascular Events
Source: PubMed Central journal article supplement — J Am Heart Assoc. 2020 Nov 23;9(23):e016318. doi: 10.1161/JAHA.119.016318 (PMC7763787; doi:10.1161/jaha.119.016318), 2020-11-23
Supplement: JAH3-9-e016318-s001.pdf [file JAH3-9-e016318-s001.pdf]

# **SUPPLEMENTAL MATERIAL**

**Table S1. Definition of the combined cardiovascular disease endpoint in the contributing statin trials from the Lipoprotein(a) Studies Collaboration.**

| <b>Components of the combined cardiovascular disease endpoint</b> | <b>4D</b> | <b>CARDS</b> | <b>LIPID</b> | <b>MIRACL</b> | <b>4S</b> |
|-------------------------------------------------------------------|-----------|--------------|--------------|---------------|-----------|
| Fatal coronary heart disease                                      | ●         | ●            | ●            | ●             | ●         |
| Non-fatal myocardial infarction                                   | ●         | ●            | ●            | ●             | ●         |
| Unstable angina                                                   | -         | ●            | ●            | ●             | -         |
| Resuscitated cardiac arrest                                       | -         | ●            | -            | -             | ●         |
| Stroke                                                            | ●         | ●            | ●            | ●             | -         |
| Coronary revascularization                                        | ●         | ●            | -            | ●             | ●         |

**Table S2. Trial-specific quartile definitions and hazard ratios for CVD in the contributing statin trials from the Lipoprotein(a) Studies Collaboration.**

|                               |              | Quartile 1  | Quartile 2       | Quartile 3       | Quartile 4       |
|-------------------------------|--------------|-------------|------------------|------------------|------------------|
| <b>"LDL-C"</b>                |              |             |                  |                  |                  |
| 4D                            | Range, mg/dL | ≤104        | 105-123          | 124-144          | ≥145             |
|                               | HR (95% CI)  | [Reference] | 0.97 (0.92-1.02) | 1.18 (1.12-1.24) | 1.20 (1.14-1.26) |
| CARDS                         | Range, mg/dL | ≤92         | 92-113           | 114-134          | ≥134             |
|                               | HR (95% CI)  | [Reference] | 1.31 (1.16-1.47) | 1.46 (1.30-1.65) | 1.76 (1.57-1.97) |
| LIPID                         | Range, mg/dL | ≤131        | 131-150          | 150-170          | ≥170             |
|                               | HR (95% CI)  | [Reference] | 1.04 (1.03-1.04) | 1.07 (1.07-1.08) | 1.14 (1.13-1.14) |
| MIRACL                        | Range, mg/dL | ≤101        | 102-122          | 123-146          | ≥147             |
|                               | HR (95% CI)  | [Reference] | 1.08 (1.05-1.11) | 0.93 (0.90-0.96) | 0.99 (0.96-1.02) |
| 4S                            | Range, mg/dL | ≤170        | 170-187          | 189-207          | ≥208             |
|                               | HR (95% CI)  | [Reference] | 1.20 (1.19-1.21) | 1.10 (1.09-1.12) | 1.25 (1.24-1.27) |
| <b>LDL-C<sub>corr30</sub></b> |              |             |                  |                  |                  |
| 4D                            | Range, mg/dL | ≤94         | 94-115           | 116-137          | ≥137             |
|                               | HR (95% CI)  | [Reference] | 0.96 (0.91-1.02) | 1.20 (1.14-1.26) | 1.04 (0.99-1.10) |
| CARDS                         | Range, mg/dL | ≤86         | 86-106           | 106-127          | ≥127             |
|                               | HR (95% CI)  | [Reference] | 1.22 (1.08-1.37) | 1.35 (1.20-1.51) | 1.60 (1.43-1.79) |
| LIPID                         | Range, mg/dL | ≤122        | 122-141          | 141-161          | ≥162             |
|                               | HR (95% CI)  | [Reference] | 1.04 (1.04-1.05) | 1.02 (1.02-1.03) | 1.08 (1.08-1.09) |
| MIRACL                        | Range, mg/dL | ≤94         | 94-115           | 115-139          | ≥140             |
|                               | HR (95% CI)  | [Reference] | 0.83 (0.80-0.85) | 0.90 (0.87-0.92) | 0.83 (0.81-0.86) |
| 4S                            | Range, mg/dL | ≤165        | 165-183          | 183-200          | ≥200             |
|                               | HR (95% CI)  | [Reference] | 1.15 (1.13-1.16) | 1.10 (1.09-1.12) | 1.16 (1.14-1.17) |

LDL-C<sub>corr30</sub> was estimated by subtracting 30% of Lp(a) mass from LDL-C. Quartiles were defined within each contributing trial based on trial-specific distributions. Hazard ratios were adjusted for age, sex, prior cardiovascular disease, diabetes, smoking, systolic blood pressure, and high-density lipoprotein cholesterol. CI=confidence interval; HR=hazard ratio.

**Table S3. Descriptive summary of corrected LDL-C in the contributing statin trials from the Lipoprotein(a) Studies Collaboration assuming varying proportions of Lp(a) cholesterol content.**

| <b>Variables</b>                | <b>4D<br/>(n=1,224)</b> | <b>CARDS<br/>(n=2,232)</b> | <b>LIPID<br/>(n=7,862)</b> | <b>MIRACL<br/>(n=2,328)</b> | <b>4S<br/>(n=4,397)</b> | <b>Total<br/>(n=18,043)</b> |
|---------------------------------|-------------------------|----------------------------|----------------------------|-----------------------------|-------------------------|-----------------------------|
| LDL-C <sub>corr20</sub> , mg/dL | 119 (31)                | 108 (30)                   | 145 (28)                   | 120 (33)                    | 185 (25)                | 135 (29)                    |
| LDL-C <sub>corr25</sub> , mg/dL | 117 (32)                | 107 (30)                   | 143 (29)                   | 119 (33)                    | 184 (25)                | 134 (29)                    |
| LDL-C <sub>corr45</sub> , mg/dL | 111 (36)                | 103 (31)                   | 138 (30)                   | 114 (34)                    | 180 (26)                | 129 (30)                    |

Data shown are means (standard deviations). LDL-C<sub>corr20</sub>, LDL-C<sub>corr25</sub>, and LDL-C<sub>corr45</sub> were estimated by subtracting 20%, 25% and 45% of Lp(a) mass from “LDL-C”, respectively. Total means and standard deviations were calculated by pooling trial-specific estimates with random-effects meta-analysis.

**Table S4. Descriptive summary of Lp(a)-C and corrected LDL-C in patients from the clinical laboratory database assuming varying proportions of Lp(a) cholesterol content.**

| Variables                       | Categories of LDL-C  |                           |                            |                            |                      | t statistic for trend <sup>a</sup> | P value for trend <sup>a</sup> |
|---------------------------------|----------------------|---------------------------|----------------------------|----------------------------|----------------------|------------------------------------|--------------------------------|
|                                 | <70 mg/dL (n=83,807) | 70-<100 mg/dL (n=178,245) | 100-<130 mg/dL (n=157,576) | 130-<190 mg/dL (n=103,597) | ≥190 mg/dL (n=7,919) |                                    |                                |
| Lp(a)-C <sub>20</sub> , mg/dL   | 3 (1-7)              | 3 (1-9)                   | 3 (2-10)                   | 4 (2-11)                   | 5 (2-14)             | 64                                 | <0.0001                        |
| Lp(a)-C <sub>25</sub> , mg/dL   | 4 (2-9)              | 4 (2-12)                  | 4 (2-12)                   | 5 (2-14)                   | 6 (3-18)             | 64                                 | <0.0001                        |
| Lp(a)-C <sub>45</sub> , mg/dL   | 6 (3-16)             | 7 (3-21)                  | 8 (4-22)                   | 9 (4-25)                   | 11 (5-32)            | 64                                 | <0.0001                        |
| LDL-C <sub>corr20</sub> , mg/dL | 51 (11)              | 78 (12)                   | 107 (12)                   | 141 (17)                   | 202 (27)             | 1,670                              | <0.0001                        |
| LDL-C <sub>corr25</sub> , mg/dL | 50 (12)              | 77 (13)                   | 105 (13)                   | 139 (18)                   | 200 (28)             | 1,531                              | <0.0001                        |
| LDL-C <sub>corr45</sub> , mg/dL | 45 (16)              | 70 (19)                   | 98 (20)                    | 132 (24)                   | 190 (34)             | 1,084                              | <0.0001                        |

Data shown are means (standard deviations) or medians (interquartile ranges). Lp(a)-C<sub>20</sub>, Lp(a)-C<sub>25</sub>, and Lp(a)-C<sub>45</sub> were estimated as 20%, 25%, and 45% of Lp(a) mass, respectively. LDL-C<sub>corr20</sub>, LDL-C<sub>corr25</sub>, and LDL-C<sub>corr45</sub> were estimated by subtracting Lp(a)-C<sub>20</sub>, Lp(a)-C<sub>25</sub>, and Lp(a)-C<sub>45</sub> from "LDL-C", respectively. <sup>a</sup>t statistics and P values for trend were calculated using linear regression.

**Figure S1. Scatter plots (A) and Pearson correlation coefficients of LDL-C and LDL-C<sub>corr30</sub> values in the contributing statin trials from the Lipoprotein(a) Studies Collaboration (n=18,043).**

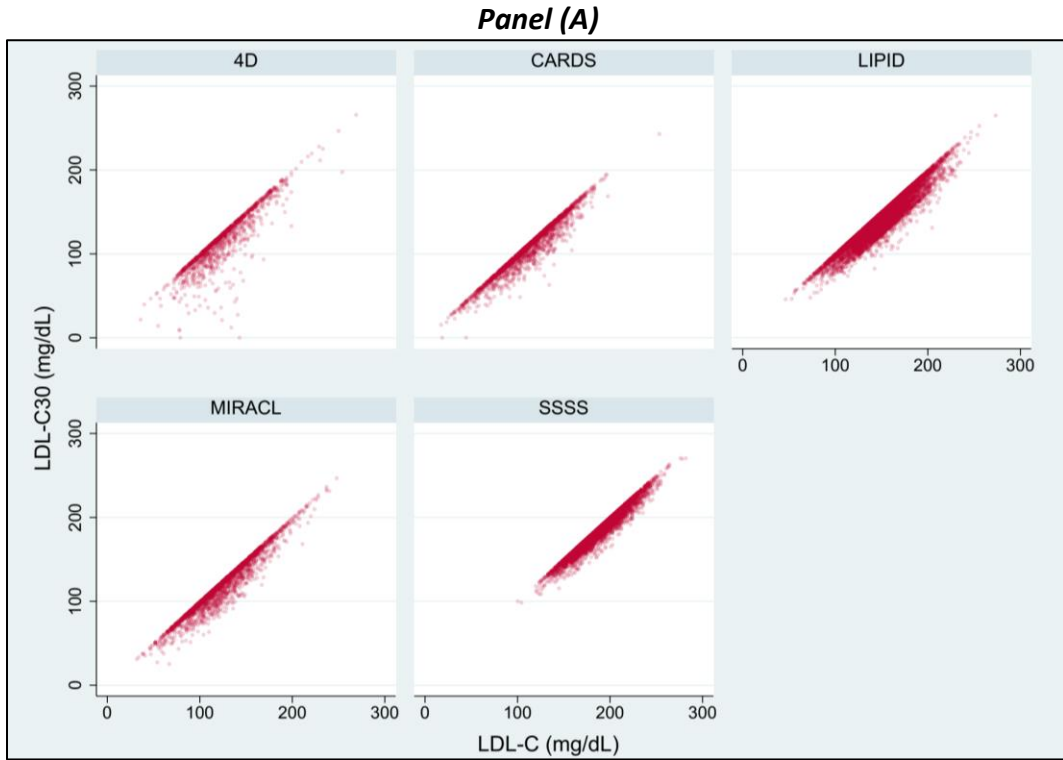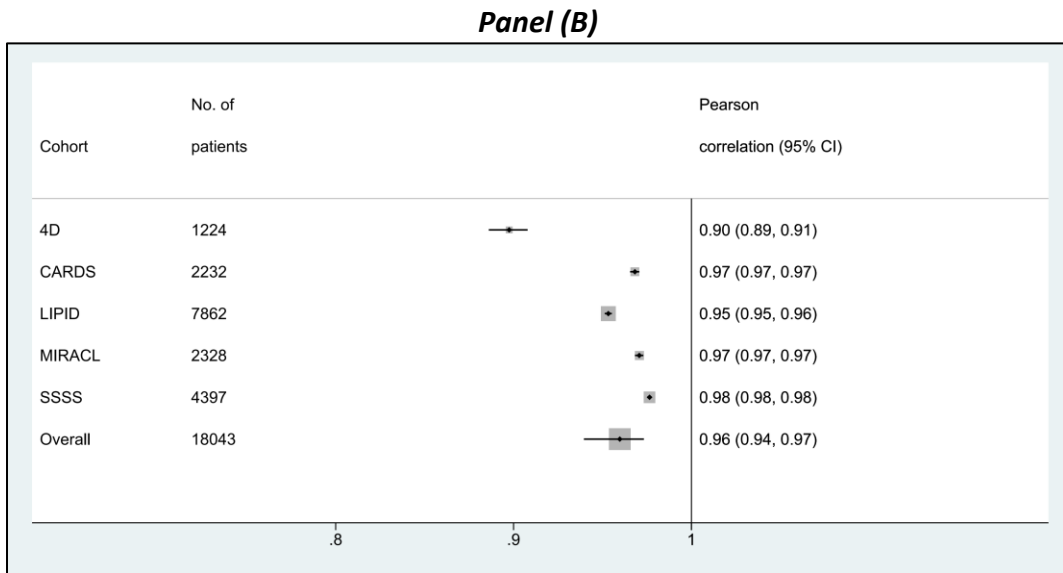

In Panel (b), the pooled Pearson correlation coefficient was estimated using random-effects meta-analysis using z-transformed study-specific correlation coefficients. CI=confidence interval.

**Figure S2. Adjusted hazard ratios for cardiovascular disease risk according to quartiles of LDL-C<sub>corr20</sub>, LDL-C<sub>corr25</sub>, and LDL-C<sub>corr45</sub> in the contributing statin trials from the Lipoprotein(a) Studies Collaboration (n=18,043).**

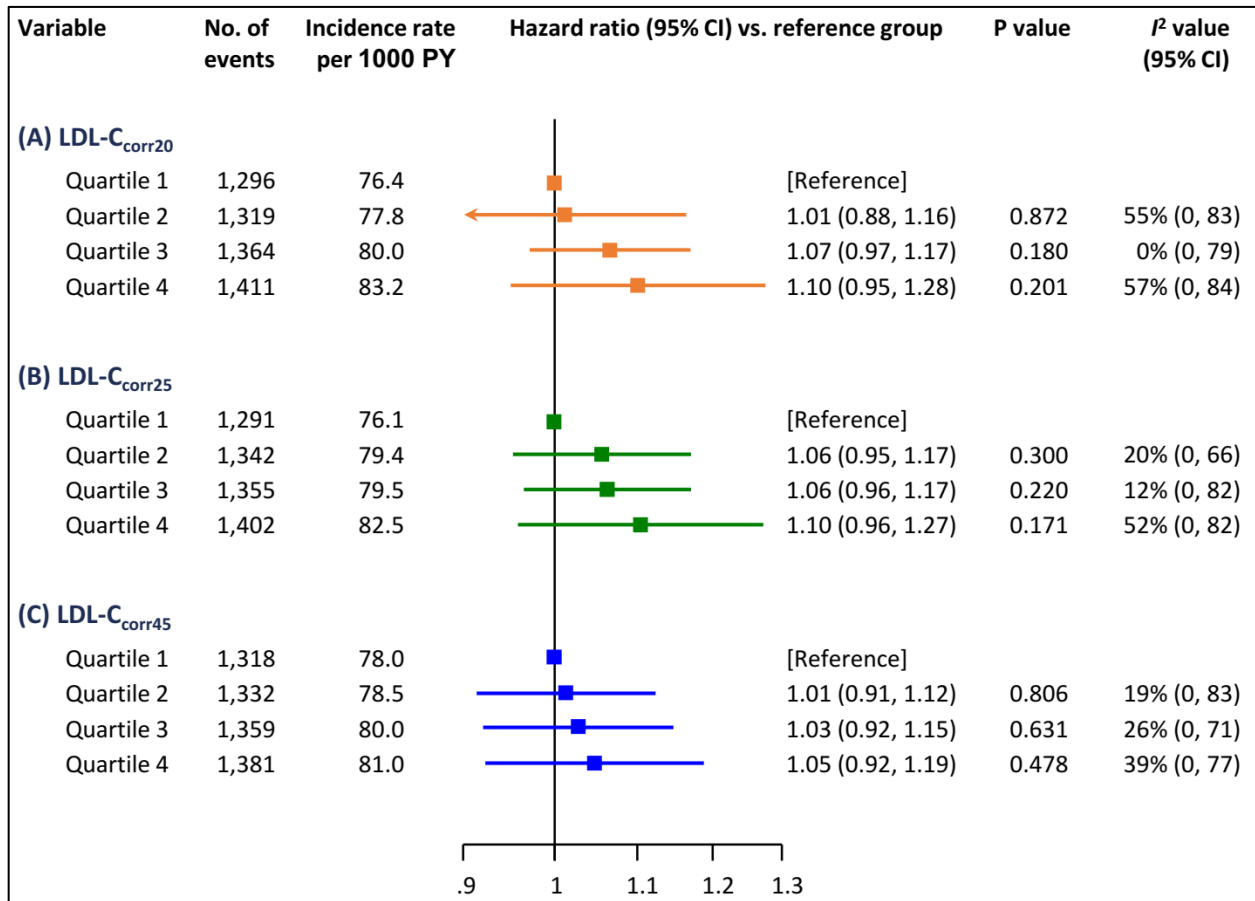

LDL-C<sub>corr20</sub>, LDL-C<sub>corr25</sub>, and LDL-C<sub>corr45</sub> were estimated by subtracting 20%, 25% and 45% of Lp(a) mass from “LDL-C”, respectively. Quartiles were defined within each contributing trial based on trial-specific distributions. Hazard ratios were adjusted for age, sex, prior cardiovascular disease, diabetes, smoking, systolic blood pressure, and high-density lipoprotein cholesterol. CI=confidence interval; PY=person-years.

**Figure S3. Adjusted hazard ratios for cardiovascular disease risk for quartiles of LDL-C and LDL-C<sub>corr30</sub> according to allocation of statin vs. placebo in the contributing statin trials from the Lipoprotein(a) Studies Collaboration (n=18,043).**

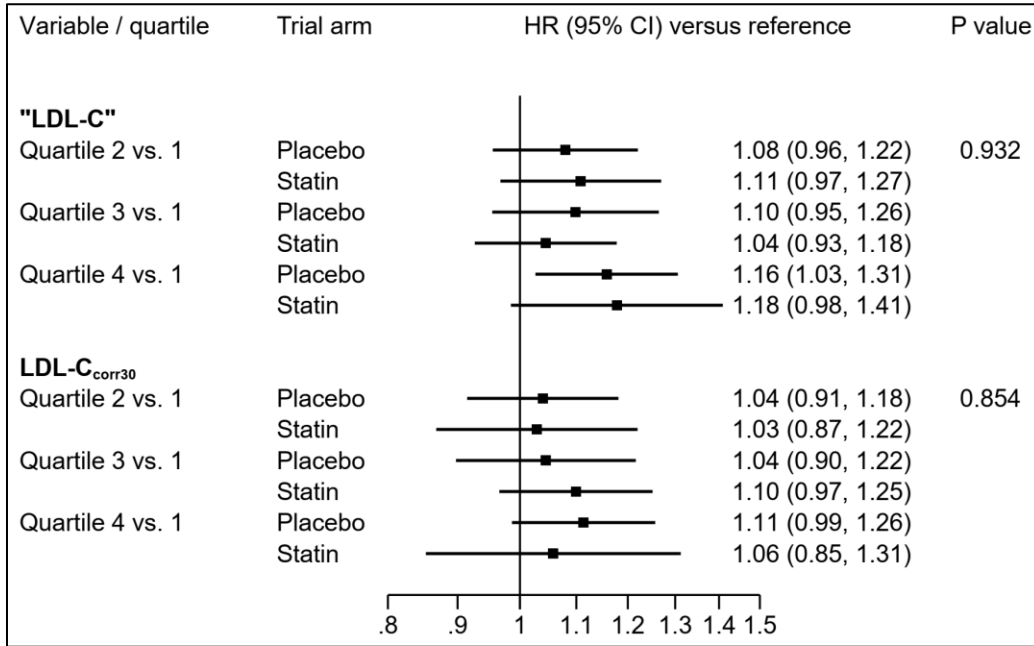

LDL-C<sub>corr30</sub> was estimated by subtracting 30% of Lp(a) mass from "LDL-C". Quartiles were defined within each contributing trial based on trial-specific distributions. Hazard ratios were adjusted for age, sex, prior cardiovascular disease, diabetes, smoking, systolic blood pressure, and high-density lipoprotein cholesterol. CI=confidence interval; HR=hazard ratio.



**Figure S4. Association of “LDL-C” with cardiovascular disease risk in a multivariable model further adjusted for  $\log_e \text{Lp(a)}$  in the contributing statin trials from the Lipoprotein(a) Studies Collaboration (n=18,043).**

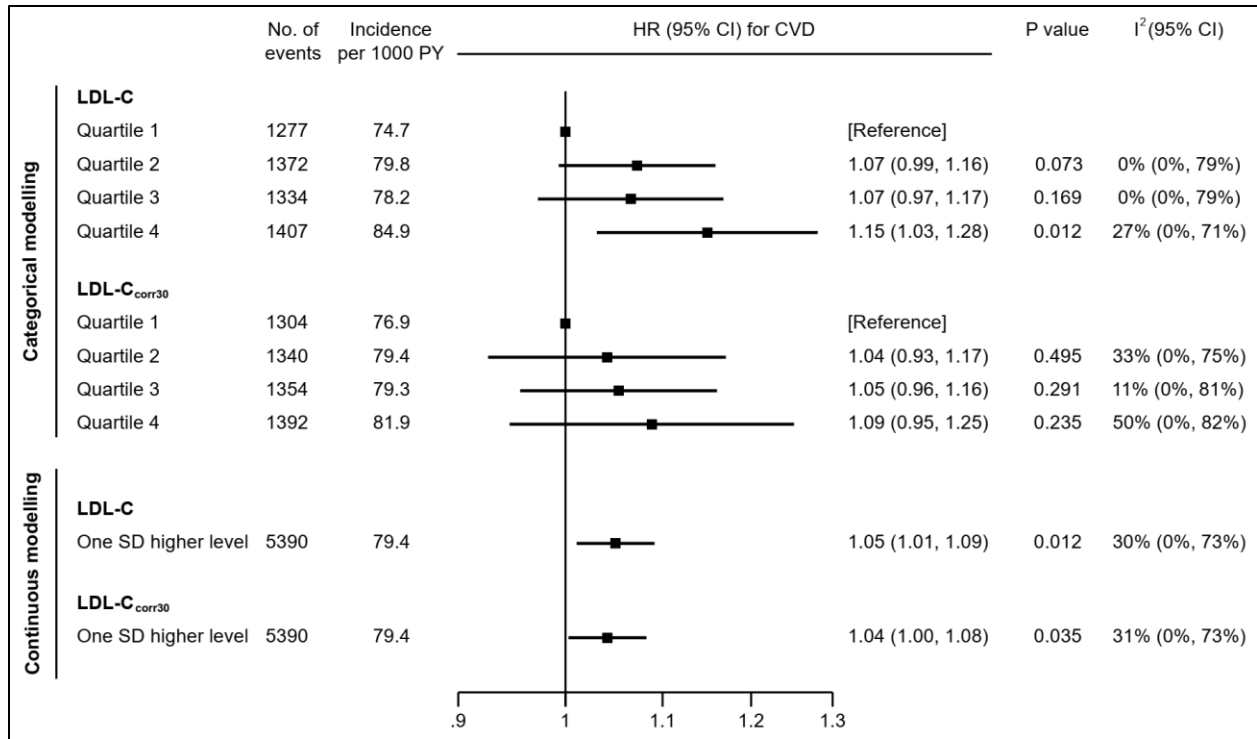

“LDL-C” quartiles were defined within each contributing trial based on trial-specific distributions. Multivariable adjustment models were adjusted for age, sex, prior cardiovascular disease, diabetes, smoking, systolic blood pressure, high-density lipoprotein cholesterol, and  $\log_e \text{Lp(a)}$ . CI=confidence interval; CVD=cardiovascular disease; HR=hazard ratio; PY=person years; SD=standard deviation.

**Figure S5. Estimated Lp(a)-C<sub>20</sub>, Lp(a)-C<sub>25</sub>, and Lp(a)-C<sub>45</sub>, contribution to LDL-C, and corrected LDL-C values in patients from the clinical laboratory database assuming varying proportions of Lp(a) cholesterol content.**

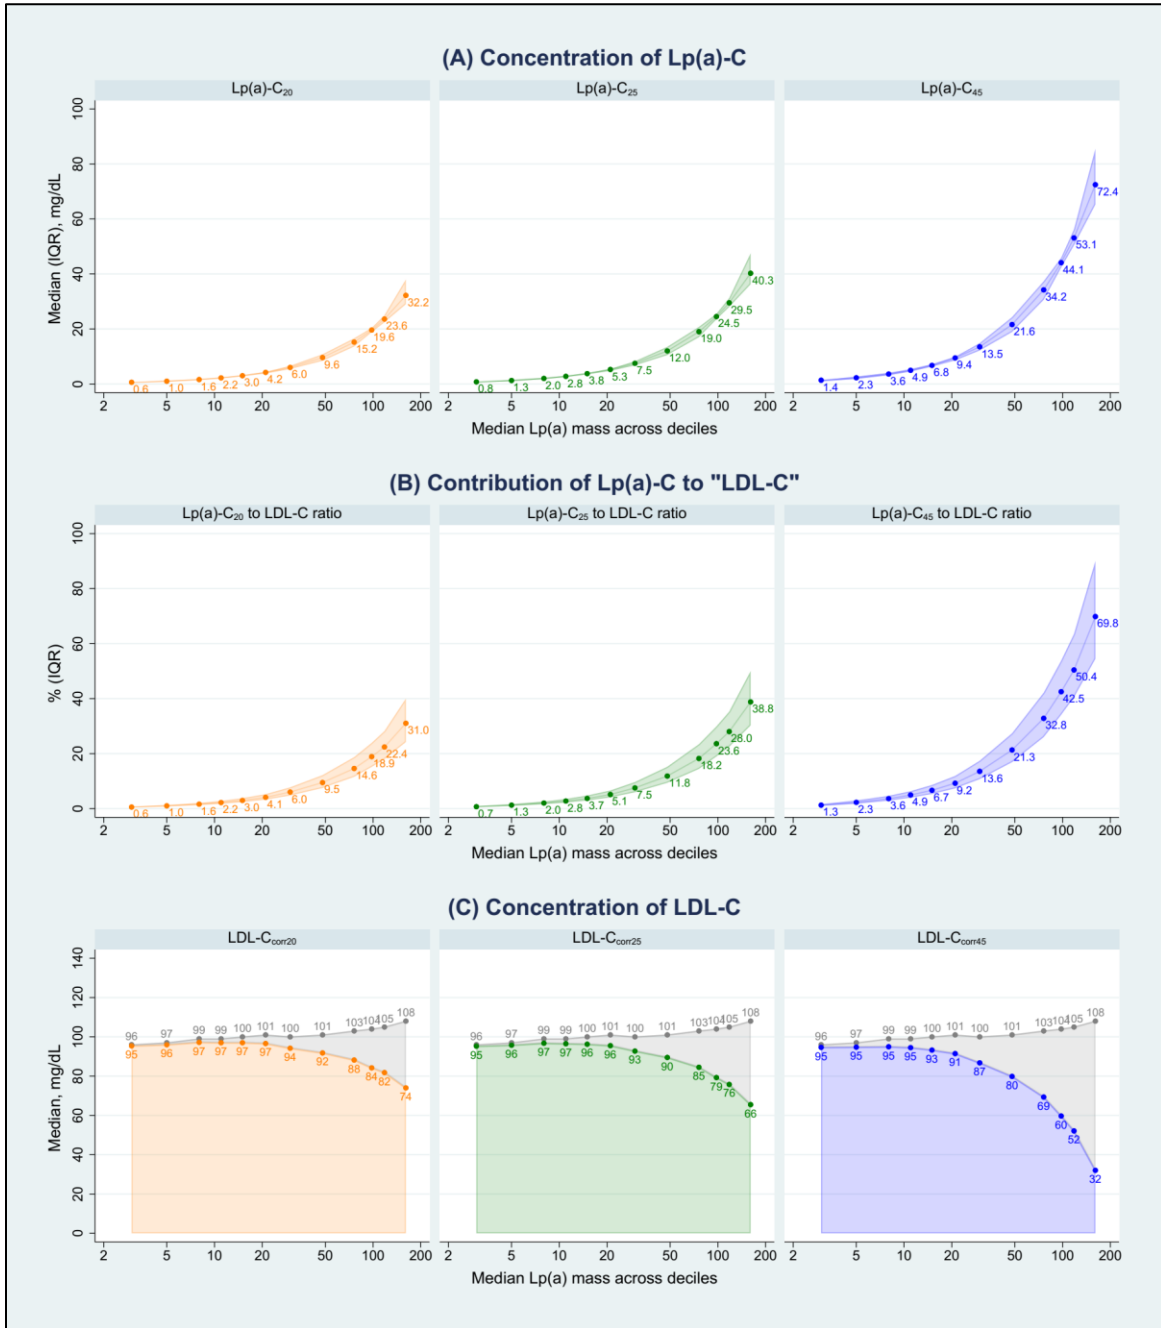

Analysis is based on the Health Diagnostic Laboratory data. Lp(a)-C<sub>20</sub>, Lp(a)-C<sub>25</sub>, and Lp(a)-C<sub>45</sub> were estimated as 20%, 25%, and 45% of Lp(a) mass, respectively. LDL-C<sub>corr20</sub>, LDL-C<sub>corr25</sub>, and LDL-C<sub>corr45</sub> were estimated by subtracting Lp(a)-C<sub>20</sub>, Lp(a)-C<sub>25</sub>, and Lp(a)-C<sub>45</sub> from "LDL-C", respectively. Groups plotted are deciles of Lp(a) mass, with the top decile further divided into thirds. IQR=interquartile-range.

**Figure S6. Reassignment to lower LDL-C categories upon correction to LDL-C<sub>corr20</sub>, LDL-C<sub>corr25</sub>, and LDL-C<sub>corr45</sub> of patients from the clinical laboratory database.**

| <b>(A) Reclassification with LDL-C<sub>corr20</sub></b> |          |                                                                    |         |          |          |       |                                       |                   |
|---------------------------------------------------------|----------|--------------------------------------------------------------------|---------|----------|----------|-------|---------------------------------------|-------------------|
|                                                         |          | <b>No. of people in categories of LDL-C<sub>corr20</sub> mg/dL</b> |         |          |          |       | <b>Reclassified to lower category</b> |                   |
|                                                         |          | <70                                                                | 70-<100 | 100-<130 | 130-<190 | ≥190  | No. of people                         | Row % (95% CI)    |
| „LDL-C“, mg/dL                                          | <70      | 83,807                                                             | 0       | 0        | 0        | 0     | NA                                    | NA                |
|                                                         | 70-<100  | 37,949                                                             | 140,296 | 0        | 0        | 0     | 37,949                                | 21.3% (21.1-21.5) |
|                                                         | 100-<130 | 1,029                                                              | 39,860  | 116,687  | 0        | 0     | 40,889                                | 25.9% (25.7-26.2) |
|                                                         | 130-<190 | 13                                                                 | 629     | 24,461   | 78,494   | 0     | 25,103                                | 24.2% (24.0-24.5) |
|                                                         | ≥190     | 0                                                                  | 0       | 0        | 2,573    | 5,346 | 2,573                                 | 32.5% (31.5-33.5) |

  

| <b>(B) Reclassification with LDL-C<sub>corr25</sub></b> |          |                                                                    |         |          |          |       |                                       |                   |
|---------------------------------------------------------|----------|--------------------------------------------------------------------|---------|----------|----------|-------|---------------------------------------|-------------------|
|                                                         |          | <b>No. of people in categories of LDL-C<sub>corr25</sub> mg/dL</b> |         |          |          |       | <b>Reclassified to lower category</b> |                   |
|                                                         |          | <70                                                                | 70-<100 | 100-<130 | 130-<190 | ≥190  | No. of people                         | Row % (95% CI)    |
| „LDL-C“, mg/dL                                          | <70      | 83,807                                                             | 0       | 0        | 0        | 0     | NA                                    | NA                |
|                                                         | 70-<100  | 46,078                                                             | 132,167 | 0        | 0        | 0     | 46,078                                | 25.9% (25.6-26.1) |
|                                                         | 100-<130 | 2,648                                                              | 45,701  | 109,227  | 0        | 0     | 48,349                                | 30.7% (30.5-30.9) |
|                                                         | 130-<190 | 42                                                                 | 1,631   | 27,935   | 73,989   | 0     | 29,608                                | 28.6% (28.3-28.9) |
|                                                         | ≥190     | 0                                                                  | 0       | 8        | 2,891    | 5,020 | 2,899                                 | 36.6% (35.5-37.7) |

  

| <b>(C) Reclassification with LDL-C<sub>corr45</sub></b> |          |                                                                    |         |          |          |       |                                       |                   |
|---------------------------------------------------------|----------|--------------------------------------------------------------------|---------|----------|----------|-------|---------------------------------------|-------------------|
|                                                         |          | <b>No. of people in categories of LDL-C<sub>corr45</sub> mg/dL</b> |         |          |          |       | <b>Reclassified to lower category</b> |                   |
|                                                         |          | <70                                                                | 70-<100 | 100-<130 | 130-<190 | ≥190  | No. of people                         | Row % (95% CI)    |
| „LDL-C“, mg/dL                                          | <70      | 83,807                                                             | 0       | 0        | 0        | 0     | NA                                    | NA                |
|                                                         | 70-<100  | 70,483                                                             | 107,762 | 0        | 0        | 0     | 70,483                                | 39.5% (39.3-39.8) |
|                                                         | 100-<130 | 15,051                                                             | 55,184  | 87,341   | 0        | 0     | 70,235                                | 44.6% (44.3-44.8) |
|                                                         | 130-<190 | 1,832                                                              | 8,186   | 33,866   | 59,713   | 0     | 43,884                                | 42.4% (42.1-42.7) |
|                                                         | ≥190     | 6                                                                  | 41      | 240      | 3,661    | 3,971 | 3,948                                 | 49.9% (48.7-51.0) |

Analysis is based on the Health Diagnostic Laboratory data. Lp(a)-C<sub>20</sub>, Lp(a)-C<sub>25</sub>, and Lp(a)-C<sub>45</sub> were estimated as 20%, 25%, and 45% of Lp(a) mass, respectively. LDL-C<sub>corr20</sub>, LDL-C<sub>corr25</sub>, and LDL-C<sub>corr45</sub> were estimated by subtracting Lp(a)-C<sub>20</sub>, Lp(a)-C<sub>25</sub>, and Lp(a)-C<sub>45</sub> from “LDL-C”, respectively. CI=confidence interval; NA=not available.
